# Supplementary material for: Sexually dimorphic brain fatty acid composition in low and high fat diet-fed mice
Source: PubMed Central journal article supplement — Mol Metab. 2016 Jun 30;5(8):680–9. doi: 10.1016/j.molmet.2016.06.014 (PMC5021676; doi:10.1016/j.molmet.2016.06.014), 2016-06-30
Supplement: mmc1.pdf [file mmc1.pdf]

## Supplementary Information

### Sexually dimorphic brain fatty acid composition in low and high fat diet-fed animals

Carlos Rodriguez-Navas<sup>1</sup>, Eugenia Morselli<sup>2\*</sup> and Deborah J. Clegg<sup>3\*</sup>

<sup>1</sup>Department of Molecular Genetics, University of Texas Southwestern Medical Center, 75390-8857, Dallas, Texas, USA, <sup>2</sup>Department of Physiology, Faculty of Biological Sciences, Pontificia Universidad Católica de Chile, 8331150, Santiago, Chile <sup>3</sup>Cedars-Sinai Diabetes and Obesity Research Institute, Department of Biomedical Research, 90048, Los Angeles, California, USA

\* Eugenia Morselli and Deborah J. Clegg share senior authorship

### Supplementary Figure

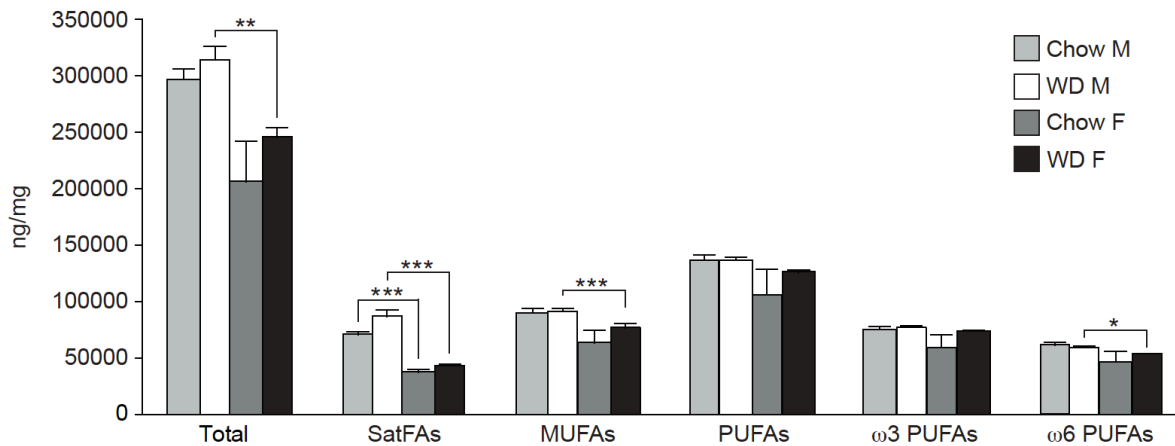

Figure S1

**Figure S1: Brain Total Fatty Acid (TFA) Concentration:** Concentration of the different classes of TFAs in the brain of male and female mice fed chow or WD. All data are presented as mean  $\pm$ SEM, and \*p < 0.05, \*\*p < 0.01, \*\*\*p < 0.001. n=4/group.

## Supplementary Tables

**Table S1. Free FAs in brain (ng/mg of tissue)**

| FA              | Chow M |      | WD M   |      | Chow F |      | WD F   |      |
|-----------------|--------|------|--------|------|--------|------|--------|------|
|                 | Av     | SEM  | Av     | SEM  | Av     | SEM  | Av     | SEM  |
| 14:0            | 4.7    | 0.2  | 7.2    | 0.1  | 4.9    | 0.3  | 7.5    | 0.4  |
| 16:1 $\omega$ 7 | 62.8   | 1.3  | 68.0   | 1.2  | 59.8   | 2.5  | 62.2   | 4.2  |
| 16:0            | 1086.3 | 30.6 | 1042.1 | 31.3 | 1098.8 | 48.8 | 1035.6 | 80.6 |
| 18:3 $\omega$ 3 | 1.2    | 0.0  | 0.7    | 0.0  | 1.2    | 0.0  | 0.6    | 0.0  |
| 18:3 $\omega$ 6 | n.d.   | -    | n.d.   | -    | n.d.   | -    | n.d.   | -    |
| 18:2 $\omega$ 6 | 60.7   | 1.9  | 30.5   | 1.2  | 61.4   | 2.3  | 29.0   | 1.0  |
| 18:1 $\omega$ 6 | n.d.   | -    | n.d.   | -    | n.d.   | -    | n.d.   | -    |
| 18:1 $\omega$ 7 | 266.6  | 7.4  | 263.2  | 7.0  | 271.6  | 14.4 | 248.4  | 11.4 |
| 18:1 $\omega$ 9 | 1022.4 | 26.1 | 1014.3 | 28.3 | 1033.5 | 51.0 | 978.2  | 41.6 |
| 18:0            | 719.8  | 24.7 | 681.7  | 27.2 | 743.3  | 49.3 | 708.3  | 58.0 |
| 20:5 $\omega$ 3 | 3.6    | 0.1  | 5.1    | 0.1  | 3.3    | 0.2  | 5.5    | 0.2  |
| 20:4 $\omega$ 6 | 1176.7 | 26.2 | 1103.2 | 49.0 | 1212.5 | 46.6 | 1079.6 | 65.4 |
| 20:3 $\omega$ 3 | n.d.   | -    | n.d.   | -    | n.d.   | -    | n.d.   | -    |
| 20:3 $\omega$ 6 | 34.9   | 1.2  | 35.2   | 0.9  | 32.0   | 1.3  | 36.2   | 0.9  |
| 20:2 $\omega$ 6 | 8.3    | 0.2  | 3.5    | 0.1  | 8.9    | 0.5  | 3.7    | 0.1  |
| 20:1 $\omega$ 3 | n.d.   | -    | n.d.   | -    | n.d.   | -    | n.d.   | -    |
| 20:1 $\omega$ 6 | n.d.   | -    | n.d.   | -    | n.d.   | -    | n.d.   | -    |
| 20:1 $\omega$ 9 | 41.7   | 1.5  | 37.4   | 1.3  | 43.6   | 2.6  | 38.6   | 1.0  |
| 20:0            | 4.0    | 0.2  | 3.4    | 0.1  | 3.8    | 0.4  | 3.3    | 0.1  |

|                 |        |       |        |       |        |       |        |       |
|-----------------|--------|-------|--------|-------|--------|-------|--------|-------|
| <b>22:6 ω3</b>  | 1621.1 | 43.6  | 1485.6 | 37.5  | 1789.7 | 85.4  | 1610.3 | 67.7  |
| <b>22:5 ω3</b>  | 16.2   | 0.5   | 17.0   | 0.8   | 14.6   | 0.7   | 15.6   | 0.2   |
| <b>22:5 ω6</b>  | 26.0   | 0.8   | 24.7   | 0.6   | 25.9   | 1.5   | 22.5   | 0.8   |
| <b>22:4 ω6</b>  | 150.9  | 4.5   | 123.7  | 4.3   | 155.7  | 7.1   | 128.7  | 4.5   |
| <b>22:3 ω3</b>  | n.d.   | -     | n.d.   | -     | n.d.   | -     | n.d.   | -     |
| <b>22:2 ω6</b>  | 0.2    | 0.0   | 0.1    | 0.0   | 0.2    | 0.0   | 0.1    | 0.0   |
| <b>22:1 ω9</b>  | 5.5    | 0.3   | 4.8    | 0.2   | 5.4    | 0.4   | 4.5    | 0.1   |
| <b>22:0</b>     | 2.8    | 0.2   | 2.3    | 0.1   | 2.6    | 0.3   | 2.1    | 0.1   |
| <b>24:1 ω9</b>  | 4.4    | 0.3   | 3.6    | 0.2   | 4.2    | 0.4   | 3.2    | 0.1   |
| <b>24:0</b>     | 3.4    | 0.3   | 2.7    | 0.2   | 2.9    | 0.4   | 2.2    | 0.0   |
| <b>Total</b>    | 6324.6 | 156.7 | 5960.2 | 177.2 | 6580.3 | 262.9 | 6026.1 | 329.8 |
| <b>SatFAs</b>   | 1822.4 | 56.2  | 1742.6 | 58.7  | 1858.0 | 97.3  | 1761.9 | 139.6 |
| <b>UnsatFAs</b> | 4503.6 | 101.9 | 4220.9 | 121.2 | 4723.9 | 215.3 | 4267.2 | 191.0 |
| <b>MUFAs</b>    | 1403.4 | 38.3  | 1391.5 | 39.2  | 1418.2 | 74.1  | 1335.3 | 55.7  |
| <b>PUFAs</b>    | 3100.3 | 69.3  | 2829.4 | 91.2  | 3305.8 | 144.7 | 2931.9 | 136.6 |
| <b>omega3</b>   | 1642.1 | 43.9  | 1508.3 | 37.3  | 1808.8 | 86.4  | 1632.0 | 67.7  |
| <b>omega6</b>   | 1458.2 | 32.5  | 1321.1 | 55.3  | 1497.0 | 61.4  | 1299.9 | 71.7  |

**Table S2. Total FAs in brain (ng/mg of tissue)**

|                | Chow M |       | WD M   |       | Chow F |       | WD F   |      |
|----------------|--------|-------|--------|-------|--------|-------|--------|------|
|                | Av     | SEM   | Av     | SEM   | Av     | SEM   | Av     | SEM  |
| <b>14:0</b>    | 11.3   | 0.4   | 19.3   | 1.0   | 7.3    | 0.5   | 12.0   | 0.7  |
| <b>16:1 ω7</b> | 113.8  | 4.0   | 133.2  | 3.3   | 83.3   | 13.1  | 105.9  | 5.0  |
| <b>16:0</b>    | 3038.8 | 145.9 | 3742.2 | 232.3 | 1630.2 | 162.6 | 1946.9 | 84.5 |
| <b>18:3 ω3</b> | 1.7    | 0.1   | 1.1    | 0.1   | 1.2    | 0.3   | 0.9    | 0.0  |
| <b>18:3 ω6</b> | 0.48   | 0.2   | 0.36   | 0.2   | 0.34   | 0.1   | 0.07   | 0.0  |
| <b>18:2 ω6</b> | 157.7  | 9.0   | 95.0   | 4.8   | 120.2  | 23.9  | 79.9   | 3.8  |
| <b>18:1 ω6</b> | n.d.   | -     | n.d.   | -     | n.d.   | -     | n.d.   | -    |
| <b>18:1 ω7</b> | 1392.2 | 61.8  | 1445.1 | 39.4  | 968.6  | 175.2 | 1158.5 | 68.1 |

|                 |         |        |         |        |         |        |         |       |
|-----------------|---------|--------|---------|--------|---------|--------|---------|-------|
| <b>18:1 ω9</b>  | 6318.4  | 297.9  | 6405.4  | 168.1  | 4556.3  | 883.9  | 5462.2  | 325.0 |
| <b>18:0</b>     | 3788.0  | 225.9  | 4775.7  | 319.1  | 1929.5  | 203.7  | 2254.2  | 114.9 |
| <b>20:5 ω3</b>  | 6.5     | 0.3    | 9.8     | 0.2    | 4.8     | 1.0    | 10.1    | 0.2   |
| <b>20:4 ω6</b>  | 4029.1  | 142.2  | 3994.7  | 128.6  | 3134.7  | 650.3  | 3643.8  | 46.5  |
| <b>20:3 ω3</b>  | n.d.    | -      | n.d.    | -      | n.d.    | -      | n.d.    | -     |
| <b>20:3 ω6</b>  | 157.6   | 5.1    | 172.8   | 4.3    | 105.7   | 22.4   | 155.5   | 6.2   |
| <b>20:2 ω6</b>  | 55.8    | 3.9    | 27.9    | 1.3    | 40.0    | 7.9    | 23.9    | 2.0   |
| <b>20:1 ω3</b>  | n.d.    | -      | n.d.    | -      | n.d.    | -      | n.d.    | -     |
| <b>20:1 ω6</b>  | n.d.    | -      | n.d.    | -      | n.d.    | -      | n.d.    | -     |
| <b>20:1 ω9</b>  | 1054.6  | 74.6   | 1024.1  | 45.4   | 701.2   | 112.3  | 840.4   | 90.3  |
| <b>20:0</b>     | 74.7    | 6.1    | 88.0    | 7.2    | 32.5    | 3.6    | 36.5    | 4.4   |
| <b>22:6 ω3</b>  | 7483.0  | 235.8  | 7615.8  | 161.4  | 5826.6  | 1232.4 | 7256.3  | 167.0 |
| <b>22:5 ω3</b>  | 75.0    | 3.5    | 77.5    | 1.2    | 47.9    | 11.1   | 75.8    | 2.5   |
| <b>22:5 ω6</b>  | 161.2   | 6.6    | 171.6   | 5.9    | 116.3   | 25.2   | 138.4   | 2.8   |
| <b>22:4 ω6</b>  | 1552.8  | 63.6   | 1437.2  | 35.8   | 1160.9  | 239.4  | 1271.9  | 41.2  |
| <b>22:3 ω3</b>  | n.d.    | -      | n.d.    | -      | n.d.    | -      | n.d.    | -     |
| <b>22:2 ω6</b>  | 6.1     | 0.5    | 4.0     | 0.3    | 3.9     | 0.6    | 2.9     | 0.4   |
| <b>22:1 ω9</b>  | 88.0    | 6.1    | 84.4    | 3.7    | 54.4    | 5.3    | 59.4    | 6.1   |
| <b>22:0</b>     | 41.6    | 3.7    | 48.3    | 4.1    | 17.3    | 2.0    | 17.8    | 2.3   |
| <b>24:1 ω9</b>  | 38.5    | 3.1    | 37.7    | 2.5    | 20.2    | 1.7    | 19.9    | 2.4   |
| <b>24:0</b>     | 34.7    | 3.0    | 39.5    | 3.7    | 14.0    | 1.6    | 13.7    | 1.9   |
| <b>Total</b>    | 29681.5 | 1070.2 | 31450.8 | 1087.3 | 20577.6 | 3737.2 | 24587.0 | 791.4 |
| <b>SatFAs</b>   | 7030.7  | 380.8  | 8776.4  | 561.2  | 3660.3  | 372.9  | 4317.7  | 204.2 |
| <b>UnsatFAs</b> | 22693.2 | 872.0  | 22759.0 | 550.4  | 16949.8 | 3390.6 | 20318.7 | 641.5 |
| <b>MUFAs</b>    | 9006.2  | 441.3  | 9151.1  | 249.5  | 6387.2  | 1189.9 | 7659.1  | 489.8 |
| <b>PUFAs</b>    | 13687.0 | 464.5  | 13607.9 | 335.6  | 10562.6 | 2213.1 | 12659.5 | 239.5 |
| <b>omega3</b>   | 7566.3  | 239.2  | 7704.3  | 162.0  | 5880.6  | 1244.7 | 7343.1  | 167.3 |
| <b>omega6</b>   | 6120.7  | 227.1  | 5903.6  | 173.7  | 4682.0  | 969.0  | 5316.4  | 96.3  |

**Table S3. Free FAs in plasma (ng/ul plasma)**

| FA             | Chow M |     | WD M |     | Chow F |     | WD F |     |
|----------------|--------|-----|------|-----|--------|-----|------|-----|
|                | Av     | SEM | Av   | SEM | Av     | SEM | Av   | SEM |
| <b>14:0</b>    | 4.2    | 0.9 | 6.5  | 0.7 | 2.7    | 1.0 | 7.6  | 1.0 |
| <b>16:1 ω7</b> | 21.1   | 3.9 | 14.8 | 1.7 | 16.2   | 2.1 | 13.4 | 1.5 |
| <b>16:0</b>    | 57.0   | 7.3 | 34.0 | 1.2 | 47.2   | 9.7 | 37.5 | 3.1 |
| <b>18:3 ω3</b> | 0.4    | 0.1 | 0.1  | 0.0 | 0.5    | 0.3 | 0.1  | 0.0 |
| <b>18:3 ω6</b> | 2.08   | 0.3 | 0.32 | 0.0 | 2.5    | 0.4 | 0.3  | 0.0 |
| <b>18:2 ω6</b> | 36.7   | 4.8 | 4.8  | 0.3 | 42.5   | 7.3 | 4.8  | 0.3 |
| <b>18:1 ω6</b> | n.d.   | -   | n.d. | -   | n.d.   | -   | n.d. | -   |
| <b>18:1 ω7</b> | 6.5    | 0.9 | 7.0  | 0.8 | 5.9    | 2.7 | 5.4  | 0.4 |
| <b>18:1 ω9</b> | 45.0   | 6.7 | 36.8 | 2.1 | 53.1   | 5.9 | 41.9 | 3.5 |
| <b>18:0</b>    | 13.8   | 1.2 | 10.3 | 0.6 | 11.8   | 2.4 | 14.5 | 1.1 |
| <b>20:5 ω3</b> | 0.3    | 0.0 | 0.2  | 0.0 | 0.2    | 0.2 | 0.3  | 0.0 |
| <b>20:4 ω6</b> | 3.9    | 0.4 | 1.7  | 0.1 | 3.7    | 1.4 | 2.2  | 0.1 |
| <b>20:3 ω3</b> | n.d.   | -   | n.d. | -   | n.d.   | -   | n.d. | -   |
| <b>20:3 ω6</b> | 0.8    | 0.1 | 0.4  | 0.0 | 0.5    | 0.7 | 0.5  | 0.0 |
| <b>20:2 ω6</b> | 0.4    | 0.0 | 0.1  | 0.0 | 0.4    | 0.2 | 0.1  | 0.0 |
| <b>20:1 ω3</b> | n.d.   | -   | n.d. | -   | n.d.   | -   | n.d. | -   |
| <b>20:1 ω6</b> | n.d.   | -   | n.d. | -   | n.d.   | -   | n.d. | -   |
| <b>20:1 ω9</b> | 1.0    | 0.1 | 0.7  | 0.0 | 1.0    | 0.4 | 0.6  | 0.0 |
| <b>20:0</b>    | 0.3    | 0.0 | 0.2  | 0.0 | 0.2    | 0.1 | 0.2  | 0.0 |
| <b>22:6 ω3</b> | 1.6    | 0.1 | 1.1  | 0.0 | 1.9    | 1.0 | 1.7  | 0.1 |
| <b>22:5 ω3</b> | 0.3    | 0.0 | 0.2  | 0.0 | 0.2    | 0.1 | 0.2  | 0.0 |
| <b>22:5 ω6</b> | 0.3    | 0.0 | 0.1  | 0.0 | 0.4    |     | 0.1  | 0.0 |
| <b>22:4 ω6</b> | 0.3    | 0.0 | 0.1  | 0.0 | 0.4    | 0.1 | 0.1  | 0.0 |
| <b>22:3 ω3</b> | n.d.   | -   | n.d. | -   | n.d.   | -   | n.d. | -   |
| <b>22:2 ω6</b> | n.d.   | -   | n.d. | -   | n.d.   | -   | n.d. | -   |
| <b>22:1 ω9</b> | 0.1    | 0.0 | 0.0  | 0.0 | 0.1    | 0.0 | 0.0  | 0.0 |
| <b>22:0</b>    | 0.1    | 0.0 | 0.0  | 0.0 | 0.0    | 0.0 | 0.0  | 0.0 |
| <b>24:1 ω9</b> | 0.0    | 0.0 | 0.0  | 0.0 | 0.1    | 0.0 | 0.0  | 0.0 |

|                 |       |      |       |     |       |      |       |      |
|-----------------|-------|------|-------|-----|-------|------|-------|------|
| <b>24:0</b>     | 0.1   | 0.0  | 0.1   | 0.0 | 0.1   | 0.0  | 0.1   | 0.0  |
| <b>Total</b>    | 196.2 | 25.3 | 119.5 | 4.6 | 191.9 | 33.6 | 131.7 | 10.6 |
| <b>SatFAs</b>   | 78.9  | 9.2  | 55.6  | 1.8 | 63.1  | 12.8 | 64.0  | 5.2  |
| <b>UnsatFAs</b> | 122.3 | 16.2 | 69.9  | 3.5 | 128.9 | 21.4 | 67.7  | 5.5  |
| <b>MUFAs</b>    | 75.3  | 11.7 | 60.8  | 3.5 | 76.5  | 4.8  | 62.6  | 5.5  |
| <b>PUFAs</b>    | 47.0  | 5.7  | 9.1   | 0.1 | 52.4  | 16.8 | 5.1   | 0.1  |
| <b>omega3</b>   | 2.6   | 0.2  | 1.6   | 0.1 | 2.7   | 1.3  | 2.3   | 0.2  |
| <b>omega6</b>   | 44.4  | 11.3 | 7.5   | 0.1 | 49.7  | 8.6  | 2.8   | 0.1  |

**Table S4. Total FAs in plasma (ng/ul of plasma).**

| FA             | Chow M |      | WD M  |      | Chow F |      | WD F  |      |
|----------------|--------|------|-------|------|--------|------|-------|------|
|                | Av     | SEM  | Av    | SEM  | Av     | SEM  | Av    | SEM  |
| <b>14:0</b>    | 4.9    | 0.7  | 8.6   | 0.4  | 6.6    | 0.8  | 6.7   | 0.3  |
| <b>16:1 ω7</b> | 50.6   | 6.7  | 52.3  | 2.5  | 44.6   | 4.4  | 32.5  | 1.9  |
| <b>16:0</b>    | 334.6  | 42.9 | 427.6 | 23.6 | 259.7  | 72.8 | 238.9 | 24.4 |
| <b>18:3 ω3</b> | 3.9    | 0.1  | 2.0   | 0.8  | 4.9    | 0.3  | 1.7   | 0.1  |
| <b>18:3 ω6</b> | 6.6    | 0.5  | 1.2   | 0.8  | 7.1    | 0.1  | 1.0   | 0.1  |
| <b>18:2 ω6</b> | 472.3  | 28.4 | 196.6 | 41.5 | 462.1  | 22.1 | 162.1 | 3.9  |
| <b>18:1 ω6</b> | n.d.   | -    | n.d.  | -    | n.d.   | -    | n.d.  | -    |
| <b>18:1 ω7</b> | 13.0   | 2.1  | 27.8  | 1.5  | 12.8   | 5.6  | 15.3  | 1.9  |
| <b>18:1 ω9</b> | 66.5   | 9.6  | 115.3 | 9.6  | 91.2   | 15.4 | 95.1  | 7.5  |
| <b>18:0</b>    | 200.9  | 25.3 | 291.8 | 21.3 | 142.5  | 41.5 | 206.3 | 22.5 |
| <b>20:5 ω3</b> | 4.5    | 0.6  | 9.3   | 1.6  | 5.7    | 1.2  | 10.2  | 0.6  |
| <b>20:4 ω6</b> | 205.8  | 10.3 | 163.6 | 21.3 | 231.5  | 28.6 | 156.3 | 12.6 |
| <b>20:3 ω3</b> | n.d.   | -    | n.d.  | -    | n.d.   | -    | n.d.  | -    |
| <b>20:3 ω6</b> | 33.2   | 4.9  | 57.2  | 7.8  | 29.9   | 9.3  | 45.6  | 3.7  |
| <b>20:2 ω6</b> | 4.8    | 0.6  | 3.5   | 0.2  | 4.6    | 0.5  | 2.6   | 0.1  |
| <b>20:1 ω3</b> | n.d.   | -    | n.d.  | -    | n.d.   | -    | n.d.  | -    |
| <b>20:1 ω6</b> | n.d.   | -    | n.d.  | -    | n.d.   | -    | n.d.  | -    |

|                 |        |       |        |      |        |       |        |      |
|-----------------|--------|-------|--------|------|--------|-------|--------|------|
| <b>20:1 ω9</b>  | 6.8    | 0.8   | 6.8    | 0.5  | 7.7    | 1.1   | 4.4    | 0.4  |
| <b>20:0</b>     | 2.6    | 0.3   | 2.1    | 0.1  | 0.9    | 0.2   | 1.2    | 0.1  |
| <b>22:6 ω3</b>  | 75.1   | 3.9   | 93.4   | 9.3  | 86.0   | 14.7  | 101.3  | 11.2 |
| <b>22:5 ω3</b>  | 6.4    | 0.6   | 5.4    | 0.7  | 3.9    | 0.5   | 3.6    | 0.3  |
| <b>22:5 ω6</b>  | 6.3    | 0.6   | 7.3    | 0.8  | 7.7    | 1.1   | 5.7    | 0.3  |
| <b>22:4 ω6</b>  | 4.4    | 0.4   | 3.8    | 0.4  | 4.6    | 0.7   | 2.5    | 0.3  |
| <b>22:3 ω3</b>  | n.d.   | -     | n.d.   | -    | n.d.   | -     | n.d.   | -    |
| <b>22:2 ω6</b>  | 0.1    | 0.0   | 0.0    | 0.0  | 0.1    | 0.0   | 0.0    | 0.0  |
| <b>22:1 ω9</b>  | 0.3    | 0.0   | 0.2    | 0.1  | 0.4    | 0.0   | 0.1    | 0.0  |
| <b>22:0</b>     | 0.4    | 0.0   | 0.4    | 0.1  | 0.3    | 0.0   | 0.2    | 0.0  |
| <b>24:1 ω9</b>  | 0.2    | 0.0   | 0.2    | 0.1  | 0.4    | 0.0   | 0.1    | 0.0  |
| <b>24:0</b>     | 0.3    | 0.0   | 0.2    | 0.1  | 0.4    | 0.0   | 0.1    | 0.0  |
| <b>Total</b>    | 1507.1 | 119.5 | 1481.8 | 79.2 | 1419.0 | 212.4 | 1097.2 | 82.6 |
| <b>SatFAs</b>   | 546.0  | 69.6  | 734.7  | 40.7 | 413.4  | 115.0 | 456.3  | 47.2 |
| <b>UnsatFAs</b> | 961.2  | 65.1  | 747.1  | 45.2 | 1005.7 | 103.4 | 641.0  | 40.1 |
| <b>MUFAs</b>    | 137.8  | 19.2  | 203.6  | 11.7 | 157.6  | 26.3  | 148.4  | 11.1 |
| <b>PUFAs</b>    | 823.3  | 48.0  | 543.5  | 42.7 | 848.1  | 78.1  | 492.6  | 29.7 |
| <b>omega3</b>   | 89.9   | 4.9   | 110.2  | 10.9 | 100.5  | 16.5  | 116.8  | 12.1 |
| <b>omega6</b>   | 733.4  | 43.1  | 433.3  | 48.9 | 747.6  | 61.8  | 375.8  | 17.9 |

**Table S5. Free FAs in cells (ng FA/ug protein).**

|                | BSA  |     | LA  |     | PA   |     | PA + LA |      |
|----------------|------|-----|-----|-----|------|-----|---------|------|
|                | Av   | SEM | Av  | SEM | Av   | SEM | Av      | SEM  |
| <b>FA</b>      |      |     |     |     |      |     |         |      |
| <b>14:0</b>    | 0.7  | 0.1 | 0.4 | 0.1 | 1.0  | 0.0 | 0.8     | 0.0  |
| <b>16:1 ω7</b> | 1.0  | 0.2 | 0.7 | 0.2 | 2.1  | 0.1 | 1.5     | 0.2  |
| <b>16:0</b>    | 10.2 | 2.0 | 6.9 | 1.8 | 38.5 | 2.7 | 39.8    | 11.4 |
| <b>18:3 ω3</b> | 0.0  | 0.0 | 0.1 | 0.0 | 0.0  | 0.0 | 0.1     | 0.0  |

|                 |      |     |      |     |      |     |      |      |
|-----------------|------|-----|------|-----|------|-----|------|------|
| <b>18:3 ω6</b>  | 0.0  | 0.0 | 0.0  | 0.0 | 0.0  | 0.0 | 0.0  | 0.0  |
| <b>18:2 ω6</b>  | 0.4  | 0.1 | 3.3  | 0.5 | 0.6  | 0.0 | 5.5  | 1.4  |
| <b>18:1 ω6</b>  | n.d. | -   | n.d. | -   | n.d. | -   | n.d. | -    |
| <b>18:1 ω7</b>  | 2.4  | 0.5 | 1.7  | 0.4 | 4.1  | 0.3 | 2.4  | 0.2  |
| <b>18:1 ω9</b>  | 7.0  | 1.3 | 5.6  | 1.4 | 11.3 | 0.6 | 8.1  | 0.8  |
| <b>18:0</b>     | 7.9  | 0.6 | 6.9  | 1.6 | 12.7 | 0.7 | 10.1 | 0.3  |
| <b>20:5 ω3</b>  | 0.1  | 0.0 | 0.1  | 0.0 | 0.3  | 0.1 | 0.2  | 0.0  |
| <b>20:4 ω6</b>  | 0.7  | 0.2 | 0.8  | 0.1 | 1.1  | 0.1 | 0.8  | 0.1  |
| <b>20:3 ω3</b>  | n.d. | -   | n.d. | -   | n.d. | -   | n.d. | -    |
| <b>20:3 ω6</b>  | 0.2  | 0.1 | 0.3  | 0.1 | 0.3  | 0.0 | 0.4  | 0.1  |
| <b>20:2 ω6</b>  | 0.0  | 0.0 | 0.3  | 0.0 | 0.1  | 0.0 | 0.3  | 0.1  |
| <b>20:1 ω3</b>  | n.d. | -   | n.d. | -   | n.d. | -   | n.d. | -    |
| <b>20:1 ω6</b>  | 0.1  | 0.0 | 0.0  | 0.0 | 0.1  | 0.0 | 0.1  | 0.0  |
| <b>20:1 ω9</b>  | 0.4  | 0.0 | 0.2  | 0.1 | 0.4  | 0.0 | 0.3  | 0.0  |
| <b>20:0</b>     | 0.2  | 0.0 | 0.1  | 0.0 | 0.3  | 0.0 | 0.2  | 0.0  |
| <b>22:6 ω3</b>  | 0.5  | 0.1 | 0.4  | 0.1 | 0.6  | 0.0 | 0.5  | 0.1  |
| <b>22:5 ω3</b>  | 0.4  | 0.1 | 0.3  | 0.1 | 0.5  | 0.0 | 0.4  | 0.0  |
| <b>22:5 ω6</b>  | 0.0  | 0.0 | 0.0  | 0.0 | 0.0  | 0.0 | 0.0  | 0.0  |
| <b>22:4 ω6</b>  | 0.1  | 0.0 | 0.1  | 0.0 | 0.1  | 0.0 | 0.1  | 0.0  |
| <b>22:3 ω3</b>  | n.d. | -   | n.d. | -   | n.d. | -   | n.d. | -    |
| <b>22:2 ω6</b>  | 0.0  | 0.0 | 0.0  | 0.0 | 0.0  | 0.0 | 0.0  | 0.0  |
| <b>22:1 ω9</b>  | 0.1  | 0.0 | 0.1  | 0.0 | 0.1  | 0.0 | 0.1  | 0.0  |
| <b>22:0</b>     | 0.2  | 0.0 | 0.1  | 0.0 | 0.2  | 0.0 | 0.2  | 0.0  |
| <b>24:1 ω9</b>  | 0.3  | 0.0 | 0.2  | 0.1 | 0.4  | 0.0 | 0.3  | 0.0  |
| <b>24:0</b>     | 0.7  | 0.1 | 0.4  | 0.1 | 0.8  | 0.1 | 0.6  | 0.1  |
| <b>Total</b>    | 34.2 | 5.2 | 29.8 | 6.6 | 76.8 | 2.6 | 73.6 | 10.7 |
| <b>SatFAs</b>   | 20.4 | 2.6 | 15.4 | 3.6 | 54.5 | 3.2 | 52.4 | 11.0 |
| <b>UnsatFAs</b> | 13.8 | 2.6 | 14.4 | 3.0 | 22.3 | 0.6 | 21.2 | 2.6  |
| <b>MUFAs</b>    | 11.3 | 2.0 | 8.7  | 2.3 | 18.8 | 0.8 | 13.0 | 1.1  |
| <b>PUFAs</b>    | 2.5  | 0.7 | 5.7  | 0.9 | 3.6  | 0.2 | 8.2  | 1.7  |



|               |     |     |     |     |     |     |     |     |
|---------------|-----|-----|-----|-----|-----|-----|-----|-----|
| <b>omega3</b> | 1.0 | 0.3 | 0.8 | 0.2 | 1.4 | 0.1 | 1.1 | 0.1 |
| <b>omega6</b> | 1.5 | 0.4 | 4.9 | 0.7 | 2.2 | 0.1 | 7.1 | 1.6 |
